# Supplementary material
Source: MDPI journal article supplement (https://www.mdpi.com/2311-5637/7/3/133)
Supplement: s1 [file s1]

Supplementary Table S3 Summary of the volatile aroma components of Marselan wine.

|              | FS36                     |       | YT28                     |       | HL12                     |       | FS Mixed                 |       | YT Mixed                 |       | HL Mixed                 |       |
|--------------|--------------------------|-------|--------------------------|-------|--------------------------|-------|--------------------------|-------|--------------------------|-------|--------------------------|-------|
|              | PeakArea*10 <sup>6</sup> | RPA   |
|              |                          | %     |                          | %     |                          | %     |                          | %     |                          | %     |                          | %     |
| Norisoprenes | N.D.                     | 0.00  | N.D.                     | 0.00  | N.D.                     | 0.00  | N.D.                     | 0.00  | 1.17                     | 0.02  | 4.42                     | 0.18  |
| Terpenes     | 2.60                     | 0.03  | 2.20                     | 0.03  | 3.03                     | 0.05  | 3.18                     | 0.05  | 2.77                     | 0.04  | 3.34                     | 0.13  |
| Alcohols     | 306.19                   | 3.68  | 379.12                   | 4.96  | 290.42                   | 4.83  | 253.70                   | 3.60  | 463.89                   | 6.85  | 326.75                   | 13.20 |
| Esters       | 7878.09                  | 94.76 | 7192.32                  | 94.03 | 5661.64                  | 94.20 | 6701.96                  | 95.05 | 6230.29                  | 92.03 | 2089.56                  | 84.43 |
| others       | 126.91                   | 1.53  | 75.35                    | 0.98  | 55.34                    | 0.92  | 92.07                    | 1.30  | 71.49                    | 1.06  | 50.84                    | 2.05  |
| sum          | 8313.79                  |       | 7648.99                  |       | 6010.43                  |       | 7050.91                  |       | 6769.61                  |       | 2474.91                  |       |
