# Supplementary material
Source: MDPI journal article supplement (https://www.mdpi.com/2311-5637/7/3/133)
Supplement: s1 [file s1]

Supplementary Table S1    The strains selected in the experiment.

| Name | Region            | Species                         | Property                  |
|------|-------------------|---------------------------------|---------------------------|
| FS36 | Fanghshan,Beijing | <i>Saccharomyces cerevisiae</i> | <i>Saccharomyces</i>      |
| FS31 | Fanghshan,Beijing | <i>Kazachstania exigua</i>      | <i>Non- Saccharomyces</i> |
| YT28 | Yantai,Shandong   | <i>Saccharomyces cerevisiae</i> | <i>Saccharomyces</i>      |
| YT2  | Yantai,Shandong   | <i>Candida glabrata</i>         | <i>Non- Saccharomyces</i> |
| HL12 | Huailai,Hebei     | <i>Saccharomyces cerevisiae</i> | <i>Saccharomyces</i>      |
| HL9  | Huailai,Hebei     | <i>Hanseniaspora opuntiae</i>   | <i>Non- Saccharomyces</i> |
