# Supplementary material
Source: MDPI journal article supplement (https://www.mdpi.com/2311-5637/7/3/133)
Supplement: s1 [file s1]

Supplementary Table S2 The results of physicochemical indexes of Marselan must and wine.

|                    | Must        | Wine (on the 19 <sup>th</sup> day) |             |             |             |             |             |
|--------------------|-------------|------------------------------------|-------------|-------------|-------------|-------------|-------------|
|                    | (0 day)     | FS36                               | YT28        | HL12        | FS Mixed    | YT Mixed    | HL Mixed    |
| <b>pH</b>          | 3.17±0.00   | 3.14±0.03a                         | 3.14±0.03a  | 3.14±0.03a  | 3.15±0.02a  | 3.12±0.02a  | 3.14±0.03a  |
| <b>Brix</b>        | 24.9±0.00   | 7.70±0.10b                         | 7.50±0.10b  | 7.30±0.00b  | 8.00±0.26a  | 7.87±0.15ab | 7.70±0.20b  |
| Alcohol (%Vol)     | N.D.        | 12.20±0.61a                        | 12.19±0.08a | 11.92±0.02a | 12.44±0.26a | 12.34±0.20a | 12.46±0.34a |
| Glycerol (g/L)     | N.D.        | 8.63±0.17a                         | 7.61±0.02d  | 7.05±0.02e  | 8.42±0.20b  | 8.14±0.52c  | 7.61±0.46d  |
| <b>Sugar (g/L)</b> |             |                                    |             |             |             |             |             |
| Glucose            | 144.55±0.00 | 1.01±0.15d                         | 1.17±0.25a  | 1.15±0.23b  | 1.09±0.14c  | 1.17±0.36a  | 1.08±0.31c  |
| Fructose           | 140.55±0.00 | 1.15±0.02e                         | 1.39±0.00d  | 1.58±0.04c  | 1.92±0.48b  | 2.92±2.29a  | 0.81±0.18f  |
| <b>Acids (g/L)</b> |             |                                    |             |             |             |             |             |
| Citric acid        | 0.02±0.00   | 0.03±0.00d                         | 0.04±0.00b  | 0.05±0.00a  | 0.04±0.00ab | 0.03±0.00c  | 0.03±0.00c  |
| Tartaric acid      | 0.34±0.05   | 0.27±0.03a                         | 0.27±0.00a  | 0.27±0.01a  | 0.27±0.02a  | 0.26±0.01a  | 0.26±0.01a  |
| Pyruvate           | N.D.        | 0.01±0.00b                         | 0.01±0.00b  | 0.01±0.01ab | 0.01±0.01a  | 0.01±0.00a  | 0.01±0.00b  |
| Malic acid         | 0.40±0.05   | 0.09±0.01b                         | 0.10±0.00b  | 0.11±0.00ab | 0.12±0.02a  | 0.11±0.01ab | 0.10±0.01ab |
| Succinic acid      | N.D.        | 0.36±0.01c                         | 0.46±0.02a  | 0.41±0.02b  | 0.33±0.01c  | 0.45±0.03ab | 0.42±0.03b  |
| Acetic acid        | N.D.        | 0.10±0.02b                         | 0.10±0.00b  | 0.15±0.00a  | 0.12±0.02b  | 0.09±0.01b  | 0.10±0.00b  |
| Ascorbic acid      | N.D.        | 0.03±0.00b                         | 0.03±0.00ab | 0.03±0.00ab | 0.03±0.01a  | 0.03±0.00a  | 0.03±0.01ab |

N.D. means no detection, different letters indicate the significant differences at  $p < 0.05$ .
